# Supplementary material
Source: HighWire-hosted journal article supplement (https://bmjopen.bmj.com/content/7/11/e017390)
Supplement: inline-supplementary-material-1 [file inline-supplementary-material-1.pdf]

**Appendix 1.** Socio-demographic and injury characteristics of POIS workforce active cohort at baseline, 12 and 24-month interviews.

|                                          | <b>Baseline</b>  | <b>12 month</b>  | <b>Relative</b>               | <b>24 month</b>  | <b>Relative</b>               |
|------------------------------------------|------------------|------------------|-------------------------------|------------------|-------------------------------|
|                                          | <b>interview</b> | <b>interview</b> | <b>difference<sup>a</sup></b> | <b>interview</b> | <b>difference<sup>a</sup></b> |
|                                          | <b>N=2 626</b>   | <b>N=2 092</b>   | <b>(%)</b>                    | <b>N=2 082</b>   | <b>(%)</b>                    |
| <b>Age</b>                               |                  |                  |                               |                  |                               |
| 18-29                                    | 635              | 435              | -31                           | 427              | -33                           |
| 30-49                                    | 1 230            | 988              | -20                           | 991              | -19                           |
| 50-64                                    | 761              | 669              | -8                            | 664              | -13                           |
| <b>Gender</b>                            |                  |                  |                               |                  |                               |
| Female                                   | 1 671            | 1 285            | -23                           | 1 271            | -24                           |
| Male                                     | 955              | 807              | -15                           | 811              | -15                           |
| <b>Occupation</b>                        |                  |                  |                               |                  |                               |
| Professional                             | 914              | 772              | -16                           | 773              | -15                           |
| Semi-professional                        | 548              | 449              | -18                           | 445              | -19                           |
| Trade or manual                          | 1 058            | 798              | -25                           | 785              | -26                           |
| Unclassified                             | 85               | 64               | -25                           | 65               | -24                           |
| Missing                                  | 21               |                  | 9                             |                  |                               |
| <b>Region</b>                            |                  |                  |                               |                  |                               |
| Auckland                                 | 866              | 686              | -21                           | 686              | -21                           |
| Manukau                                  | 732              | 555              | -24                           | 555              | -24                           |
| Gisborne                                 | 190              | 141              | -26                           | 134              | -29                           |
| Otago                                    | 537              | 467              | -13                           | 455              | -15                           |
| Southland                                | 301              | 243              | -19                           | 252              | -16                           |
| <b>Anatomical injury severity – NISS</b> |                  |                  |                               |                  |                               |

|                                                |       |       |     |       |     |
|------------------------------------------------|-------|-------|-----|-------|-----|
| 1-3                                            | 1 101 | 864   | -22 | 855   | -22 |
| 4-6                                            | 1 179 | 956   | -19 | 948   | -20 |
| >6                                             | 263   | 213   | -19 | 217   | -17 |
| Missing                                        | 83    | 59    |     |       |     |
| Earnings-related compensation                  |       |       |     |       |     |
| Yes                                            | 2 169 | 1 709 | -21 | 1 694 | -22 |
| No                                             | 457   | 383   | -16 | 388   | -15 |
| Lower extremity fracture                       |       |       |     |       |     |
| No                                             | 2 206 | 1 739 | -21 | 1 746 | -21 |
| Yes                                            | 420   | 353   | -16 | 336   | -20 |
| Upper extremity fracture                       |       |       |     |       |     |
| No                                             | 2 169 | 1 728 | -20 | 1 717 | -21 |
| Yes                                            | 457   | 364   | -20 | 365   | -20 |
| Lower extremity dislocation,<br>sprain, strain |       |       |     |       |     |
| No                                             | 2 031 | 1 608 | -21 | 1 587 | -22 |
| Yes                                            | 595   | 484   | -19 | 495   | -17 |
| Upper extremity dislocation,<br>sprain, strain |       |       |     |       |     |
| No                                             | 2 263 | 1 819 | -20 | 1 804 | -20 |
| Yes                                            | 363   | 273   | -25 | 278   | -23 |
| Spine dislocation, sprain, strain              |       |       |     |       |     |
| No                                             | 2 195 | 1 754 | -20 | 1 743 | -21 |
| Yes                                            | 431   | 338   | -22 | 339   | -21 |
| Head, neck and intracranial                    |       |       |     |       |     |

|                             |       |       |     |       |     |
|-----------------------------|-------|-------|-----|-------|-----|
| No                          | 2 535 | 2 018 | -20 | 2 003 | -21 |
| Yes                         | 91    | 74    | -19 | 79    | -13 |
| Lower extremity open wound  |       |       |     |       |     |
| No                          | 2 522 | 2 007 | -20 | 1 999 | -21 |
| Yes                         | 104   | 85    | -18 | 83    | -20 |
| Upper extremity open wound  |       |       |     |       |     |
| No                          | 2 463 | 1 963 | -20 | 1 966 | -20 |
| Yes                         | 163   | 129   | -21 | 116   | -29 |
| Lower extremity superficial |       |       |     |       |     |
| No                          | 2 446 | 1 950 | -20 | 1 938 | -21 |
| Yes                         | 180   | 142   | -21 | 144   | -20 |
| Upper extremity superficial |       |       |     |       |     |
| No                          | 2 499 | 1 991 | -20 | 1 988 | -20 |
| Yes                         | 127   | 101   | -20 | 94    | -26 |
| Head, neck superficial      |       |       |     |       |     |
| No                          | 2 538 | 2 020 | -20 | 2 011 | -21 |
| Yes                         | 88    | 72    | -18 | 71    | -19 |
| Other region                |       |       |     |       |     |
| No                          | 2 175 | 1 724 | -21 | 1 711 | -21 |
| Yes                         | 451   | 368   | -18 | 371   | -18 |

---

<sup>a</sup> relative difference compared to baseline interview cohort
